# Supplementary material
Source: PubMed Central journal article supplement (PMC4450675)
Supplement: NIHMS677067-supplement-Supplement1.pdf [file NIHMS677067-supplement-Supplement1.pdf]

## Supplementary Appendix

This appendix has been provided by the authors to give readers additional information about their work.

Supplement to: Seydel KB, Kampondeni SD, Valim C, et al. Brain swelling and death in children with cerebral malaria. *N Engl J Med* 2015;372:1126-37. DOI: 10.1056/NEJMoa1400116

## Supplementary Appendix

### Title: Brain Swelling Predicts Death in Pediatric Cerebral Malaria

**Authors:** Seydel KB<sup>1,2</sup>, Kampondeni SD<sup>2,3</sup>, Valim C<sup>4</sup>, Potchen MJ<sup>5,a</sup>, Milner DA<sup>2,4,6</sup>, Muwalo FW<sup>2</sup>, Birbeck GL<sup>7,b</sup>, Bradley WG<sup>8</sup>, Fox LL<sup>1,2</sup>, Glover SJ<sup>9,c</sup>, Hammond CA<sup>5</sup>, Heyderman RS<sup>10</sup>, Chilingulo CA<sup>3</sup>, Molyneux ME<sup>10,11</sup>, Taylor TE<sup>1,2</sup>.

1) Department of Osteopathic Medical Specialties, College of Osteopathic Medicine, Michigan State University, East Lansing, Michigan.

2) Blantyre Malaria Project, University of Malawi College of Medicine, Blantyre, Malawi.

3) Queen Elizabeth Central Hospital, Chichiri, Blantyre, Malawi.

4) Department of Immunology and Infectious Diseases, Harvard School of Public Health, Boston, Massachusetts

5) Department of Radiology, Michigan State University, East Lansing, Michigan

6) Department of Pathology, Brigham and Women's Hospital, Boston, Massachusetts

7) Department of Neurology and Ophthalmology, International Neurologic and Psychiatric Epidemiology Program (INPEP), Michigan State University, East Lansing, Michigan.

8) Department of Radiology, University of California San Diego, San Diego, California.

9) College of Medicine, University of Malawi, Blantyre, Malawi.

10) Malawi-Liverpool-Wellcome Trust Clinical Research Programme, University of Malawi College of Medicine, Blantyre, Malawi.

11) Liverpool School of Tropical Medicine, Liverpool, UK

a) Present affiliation: Department of Imaging Sciences, University of Rochester Medical Center, Rochester, New York.

b) Present affiliation: Department of Neurology, University of Rochester Medical Center, Rochester, New York.

c) Present affiliation: School of Medicine, University of St Andrews, St Andrews, Fife, UK

Correspondence: Terrie Taylor, West Fee Hall, 909 Fee Rd, Room B305-B, East Lansing, MI 48824, (517)-353-3211, [ttmalawi@msu.edu](mailto:ttmalawi@msu.edu)

## Table of Contents

- S3.**           **Figure S1:** Scatterplot of concordance between MRI readings of two independent radiologists
- S4-7.**       **Table S1:** — Association of clinical and laboratory findings at admission with the subsequent risk of death in patients with retinopathy-positive cerebral malaria who underwent an admission MRI scan.
- S8-9.**       **Table S2:** MR Protocols
- S10.**       **Table S3:** Agreement between readings of two independent radiologists of MRI features
- S11-13.**   **Table S4:** Comparison of clinical and laboratory findings of retinopathy-positive CM patients who did undergo MRI and those who died prior to undergoing MRI

**Figure S1 – Scatterplot of concordance between MRI readings of two independent radiologists.** Concordance between the two readings in both post-pontine (fourth ventricle) CSF (A) and pre-pontine CSF (B) was good. Straight solid line represents the line of perfect agreement, dashed line represents the regression line of observed agreement. Also shown is the intraclass correlation coefficient (ICC) of agreement with 95% confidence interval (CI).

**A)**

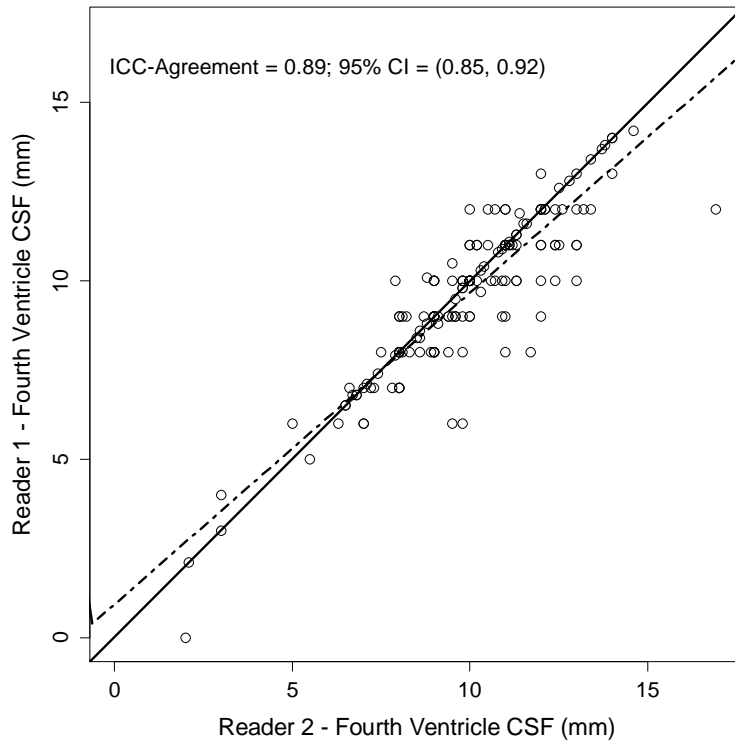

**B)**

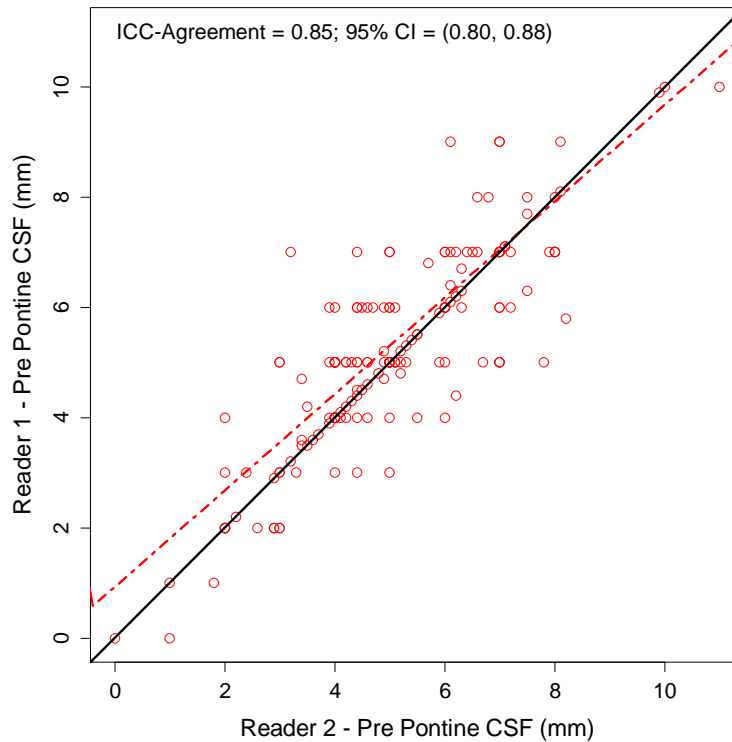

**Table S1** — Association of clinical and laboratory findings at admission with the subsequent risk of death in patients with retinopathy-positive cerebral malaria who underwent an admission MRI scan.

|                                                              | <b>Survivors</b><br>(N = 143) | <b>Deaths</b><br>(N = 25) | <b>P *</b>  |
|--------------------------------------------------------------|-------------------------------|---------------------------|-------------|
| <b>Demographic</b>                                           |                               |                           |             |
| Age (months), <i>mean ± SD</i>                               | <b>52 ± 27</b>                | <b>50 ± 30</b>            | <b>0.76</b> |
| Gender (male), <i>n (%)</i>                                  | <b>74 (52%)</b>               | <b>11 (44%)</b>           | <b>0.52</b> |
| MUAC, <i>mean ± SD</i>                                       | <b>15.1 ± 1.7</b>             | <b>14.9 ± 1.6</b>         | <b>0.57</b> |
| Weight (kg), <i>mean ± SD</i>                                | <b>14 ± 5</b>                 | <b>13 ± 4</b>             | <b>0.39</b> |
| Height (cm), <i>mean ± SD</i>                                | <b>98 ± 16</b>                | <b>95 ± 14</b>            | <b>0.39</b> |
| <b>History of Present Illness</b>                            |                               |                           |             |
| Duration of fever (hrs) prior to admission, <i>mean ± SD</i> | <b>64.2 ± 32.3</b>            | <b>55.3 ± 31.6</b>        | <b>0.21</b> |
| Duration of coma (hrs) prior to admission, <i>mean ± SD</i>  | <b>15.6 ± 20.8</b>            | <b>14.5 ± 15.4</b>        | <b>0.76</b> |
| History of seizures prior to admission, <i>n (%)</i>         | <b>123 (88%)</b>              | <b>20 (80%)</b>           | <b>0.32</b> |
| <b>Clinical Examination on Admission</b>                     |                               |                           |             |
| Temperature (°C), <i>mean ± SD</i>                           | <b>38.8 ± 1.2</b>             | <b>38.8 ± 1.3</b>         | <b>0.94</b> |
| Pulse rate (beats/min), <i>mean ± SD</i>                     | <b>152 ± 24</b>               | <b>156 ± 26</b>           | <b>0.47</b> |

|                                                        |                       |                       |              |
|--------------------------------------------------------|-----------------------|-----------------------|--------------|
| Respiratory rate (/min), <i>mean ± SD</i>              | <b>44 ± 11</b>        | <b>47 ± 12</b>        | <b>0.20</b>  |
| Liver size (cm below costal margin), <i>mean ± SD</i>  | <b>1.4 ± 1.6</b>      | <b>1.7 ± 1.6</b>      | <b>0.32</b>  |
| Jaundice, <i>n (%)</i>                                 | <b>12 (8%)</b>        | <b>3 (12%)</b>        | <b>0.47</b>  |
| Spleen size (cm below costal margin), <i>mean ± SD</i> | <b>0.9 ± 1.4</b>      | <b>0.7 ± 1.2</b>      | <b>0.73</b>  |
| Nasal flaring, <i>n (%)</i>                            | <b>20 (14%)</b>       | <b>6 (24%)</b>        | <b>0.23</b>  |
| Deep breathing, <i>n (%)</i>                           | <b>29 (20%)</b>       | <b>5 (20%)</b>        | <b>1.00</b>  |
| Blantyre Coma Score, <i>n (%)</i>                      |                       |                       | <b>0.09</b>  |
| 0                                                      | <b>13 (9%)</b>        | <b>2 (8%)</b>         |              |
| 1                                                      | <b>71 (49%)</b>       | <b>15 (60%)</b>       |              |
| 2                                                      | <b>59 (41%)</b>       | <b>8 (32%)</b>        |              |
| Neck rigidity, <i>n (%)</i>                            | <b>5 (3%)</b>         | <b>1 (4%)</b>         | <b>1.00</b>  |
| Seizures at time of admission, <i>n (%)</i>            | <b>28 (20%)</b>       | <b>4 (16%)</b>        | <b>0.79†</b> |
| Papilledema®, <i>n (%)</i>                             | <b>46 (33%)</b>       | <b>10 (40%)</b>       | <b>0.50</b>  |
| CSF opening pressure (mm CSF), <i>median (IQR)</i> &   | <b>140 (100, 180)</b> | <b>170 (119, 230)</b> | <b>0.33</b>  |

### **Laboratory Findings on Admission**

|                                               |                   |                   |             |
|-----------------------------------------------|-------------------|-------------------|-------------|
| Hematocrit (%), <i>mean ± SD</i>              | <b>20.8 ± 5.6</b> | <b>20.9 ± 4.6</b> | <b>0.89</b> |
| Severe anemia (hematocrit ≤ 15), <i>n (%)</i> | <b>20 (14%)</b>   | <b>2 (8%)</b>     | <b>0.59</b> |

|                                                                        |                              |                              |               |
|------------------------------------------------------------------------|------------------------------|------------------------------|---------------|
| Platelets (x 10 <sup>9</sup> /dl blood), <i>median (IQR)</i>           | <b>54 (34, 87)</b>           | <b>46 (25, 71)</b>           | <b>0.17</b>   |
| Thrombocytopenia (platelets ≤ 150 x 10 <sup>9</sup> /dl), <i>n (%)</i> | <b>127 (93%)</b>             | <b>22 (96%)</b>              | <b>1.0</b>    |
| Parasitemia (10 <sup>3</sup> /μl blood), <i>median (IQR)</i>           | <b>55778 (12660, 220000)</b> | <b>71280 (31680, 528000)</b> | <b>0.23</b>   |
| White blood cell (10 <sup>9</sup> / μl blood), <i>median (IQR)</i>     | <b>8.4 (6.6, 12.7)</b>       | <b>11.7 (6.7, 19.4)</b>      | <b>0.05</b>   |
| Sodium <sup>#</sup> (mEq/L)                                            | <b>136.3 ± 7.4</b>           | <b>136.0 ± 4.7</b>           | <b>0.89</b>   |
| Chloride <sup>#</sup> (mEq/L)                                          | <b>103.5 ± 6.8</b>           | <b>103.6 ± 4.8</b>           | <b>0.97</b>   |
| Potassium <sup>#</sup> (mEq/L)                                         | <b>4.0 ± 0.7</b>             | <b>3.8 ± 0.6</b>             | <b>0.40</b>   |
| Calcium <sup>#</sup> (mmol/L)                                          | <b>2.1 ± 0.4</b>             | <b>2.1 ± 0.4</b>             | <b>0.98</b>   |
| Lactate (mmol/l), <i>mean ± SD</i>                                     | <b>6.8 ± 4.2</b>             | <b>9.8 ± 4.2</b>             | <b>0.001</b>  |
| Hyperlactatemia (lactate ≥ 5), <i>n (%)</i>                            | <b>82 (58%)</b>              | <b>21 (84%)</b>              | <b>0.31</b>   |
| Blood Glucose (mmol/l), <i>mean ± SD</i> <sup>®</sup>                  | <b>6.3 ± 2.9</b>             | <b>6.8 ± 3.5</b>             | <b>0.52</b>   |
| Hypoglycemia at or immediately prior to admission, <i>n (%)</i>        | <b>31 (22%)</b>              | <b>7 (28%)</b>               | <b>0.48</b>   |
| CSF white cell count ≥5, <i>n (%)</i> <sup>&amp;</sup>                 | <b>13 (11%)</b>              | <b>3 (20%)</b>               | <b>0.42 †</b> |
| Median (IQR) of values ≥ 5                                             | <b>7 (5, 10)</b>             | <b>9 (6, 12)</b>             | <b>0.70</b>   |
| HIV positive <sup>^</sup>                                              | <b>2 (9.5%)</b>              | <b>17 (13.1%)</b>            | <b>0.75 †</b> |

SD = standard deviation, MUAC = mid-upper arm circumference, IQR = interquartile range

\* P-values were estimated through t-tests when reporting means, Wilcoxon rank sum tests when reporting medians, and Pearson X<sup>2</sup> when reporting proportions, except where marked with † when Fisher Exact tests were used.

<sup>®</sup> Calculated on 164 patients (25 deaths, 139 survivors)

<sup>&</sup> A total of 107 children who survived and 15 children who died had CSF analysis.

<sup>#</sup> Calculated on 148 patients (12/25 deaths, 136/143 survivors)

% Calculated on those patients who had not received dextrose prior to admission, n=115 for survivors and 19 for deaths.

^ Calculated on patients who underwent HIV testing, n=130 for survivors and 21 for deaths.

No CSF or blood cultures resulted in growth of a pathogen.



**Table S2. MR Protocols.** Shaded areas denote scan sequences that remained constant for all three years.

| <b>2009</b>                    | <b>Sag T1<br/>Flair *</b> | <b>Axial<br/>T1 *</b> | <b>Axial<br/>T2 *</b> | <b>Cor<br/>T2 *</b> | <b>DWI<br/>*</b>  | <b>Axial<br/>T2 Flair</b> | <b>Axial<br/>GRE</b> | <b>Axial<br/>PD</b> |                     |
|--------------------------------|---------------------------|-----------------------|-----------------------|---------------------|-------------------|---------------------------|----------------------|---------------------|---------------------|
| Parameters                     |                           |                       |                       |                     | b=200             |                           |                      |                     |                     |
| Acquisition mode               | 2D                        | 2D                    | 2D                    | 2D                  | 2D                | 2D                        | 2D                   | 2D                  |                     |
| Acquisition sequence           | T1 Flair                  | FSE-XL                | FRFSE-XL              | FRFSE-XL            | EPI               | T2 Flair                  | GRE                  | FREFSE-XL           |                     |
| TE (ms)                        | 24                        | 20                    | 123                   | 110                 | 140               | 100                       | 16.4                 | 35                  |                     |
| TR (ms)                        | 2200                      | 550                   | 3300                  | 3525                | 8000              | 7850                      | 500                  | 3150                |                     |
| TI (ms)                        | 750                       |                       |                       |                     |                   | 750                       |                      | 11                  |                     |
| Echo Train Length              |                           | 11                    | 11                    | 12                  |                   |                           |                      |                     |                     |
| Excitation Flip Angle(degrees) |                           |                       |                       |                     |                   |                           | 35                   |                     |                     |
| No. of excitations             | 1                         | 3                     | 3                     | 3                   | 1                 | 3                         | 3                    | 3                   |                     |
| FOV                            | 25                        | 18.75                 | 18.75                 | 18.75               | 18.75             | 25                        | 18.75                | 18.75               |                     |
| Matrix Size                    | 256x128                   | 288x160               | 256x128               | 288x192             | 64x64             | 256x128                   | 256x128              | 384x256             |                     |
| No. of slices                  | 20                        | 26                    | 24                    | 26                  | 24                | 24                        | 24                   | 24                  |                     |
| Slice Thickness (mm)           | 6.0                       | 6.0                   | 6.0                   | 7.0                 | 6.0               | 6.0                       | 6.0                  | 6.0                 |                     |
| Slice Gap (mm)                 | 1.5                       | 0.3                   | 0.3                   | 1.0                 | 1.0               | 0.3                       | 0.3                  | 0.3                 |                     |
| <b>2010</b>                    | <b>Sag T1<br/>Flair</b>   | <b>Axial<br/>T1</b>   | <b>Axial<br/>T2</b>   | <b>Cor<br/>T2</b>   | <b>DWI</b>        | <b>DWI</b>                | <b>Axial<br/>GRE</b> |                     |                     |
| Parameters                     |                           |                       |                       |                     | b=200             | b=900                     |                      |                     |                     |
| Acquisition mode               | 2D                        | 2D                    | 2D                    | 2D                  | 2D                | 2D                        | 2D                   |                     |                     |
| Acquisition sequence           | T1 Flair                  | FSE-XL                | FRFSE-XL              | FRFSE-XL            | EPI               | EPI                       | GRE                  |                     |                     |
| TE (ms)                        | 24                        | 20                    | 123                   | 110                 | 140               | 140                       | 16.4                 |                     |                     |
| TR (ms)                        | 2200                      | 550                   | 3300                  | 3525                | 8000              | 8000                      | 500                  |                     |                     |
| TI (ms)                        | 750                       |                       |                       |                     |                   |                           |                      |                     |                     |
| Echo Train Length              |                           | 11                    | 11                    | 14                  |                   |                           |                      |                     |                     |
| Excitation Flip Angle(degrees) |                           |                       |                       |                     |                   |                           | 35                   |                     |                     |
| No. of excitations             | 1                         | 3                     | 3                     | 3                   | 1                 | 1                         | 3                    |                     |                     |
| FOV                            | 25                        | 18.75                 | 18.75                 | 18.75               | 18.75             | 18.75                     | 18.75                |                     |                     |
| Matrix Size                    | 256x128                   | 288x160               | 256x128               | 288x192             | 64x64             | 64x64                     | 256x12               |                     |                     |
| No. of slices                  | 20                        | 26                    | 24                    | 26                  | 24                | 24                        | 24                   |                     |                     |
| Slice Thickness (mm)           | 6.0                       | 6.0                   | 6.0                   | 7.0                 | 6.0               | 6.0                       | 6.0                  |                     |                     |
| Slice Gap (mm)                 | 1.5                       | 0.3                   | 0.3                   | 1.0                 | 1.0               | 1.0                       | 0.3                  |                     |                     |
| <b>2011</b>                    | <b>Sag T1<br/>Flair</b>   | <b>Axial<br/>T1</b>   | <b>Axial<br/>T2</b>   | <b>Cor<br/>T2</b>   | <b>DWI</b>        | <b>DWI</b>                | <b>DWI</b>           | <b>DWI</b>          | <b>Axial<br/>T2</b> |
| Parameters                     |                           |                       | straight              |                     | b=200<br>straight | b=900<br>straight         | sag                  | coronal             | oblique             |
| Acquisition mode               | 2D                        | 2D                    | 2D                    | 2D                  | 2D                | 2D                        | 2D                   | 2D                  | 2D                  |
| Acquisition sequence           | T1 Flair                  | FSE-XL                | FRFSE-XL              | FRFSE-XL            | EPI               | EPI                       | EPI                  | EPI                 | FRFSE-XL            |
| TE (ms)                        | 24                        | 20                    | 123                   | 110                 | 140               | 140                       | 140                  | 140                 | 123                 |

|                      |         |         |         |         |       |       |       |       |         |
|----------------------|---------|---------|---------|---------|-------|-------|-------|-------|---------|
| TR (ms)              | 2200    | 550     | 3300    | 3525    | 8000  | 8000  | 8000  | 8000  | 3300    |
| TI (ms)              | 750     |         |         |         |       |       |       |       |         |
| Echo Train Length    |         | 11      | 11      | 14      |       |       |       |       | 11      |
| No. of excitations   | 1       | 3       | 3       | 3       | 1     | 1     | 1     | 1     | 3       |
| FOV                  | 25      | 18.75   | 18.75   | 18.75   | 18.75 | 18.75 | 18.75 | 18.75 | 18.75   |
| Matrix Size          | 256x128 | 288x160 | 256x128 | 288x192 | 64x64 | 64x64 | 64x64 | 64x64 | 256x128 |
| No. of slices        | 20      | 26      | 24      | 26      | 24    | 24    | 24    | 24    | 24      |
| Slice Thickness (mm) | 6.0     | 6.0     | 6.0     | 7.0     | 6.0   | 6.0   | 6.0   | 6.0   | 6.0     |
| Slice Gap (mm)       | 1.5     | 0.3     | 0.3     | 1.0     | 1.0   | 1.0   | 1.0   | 1.0   | 0.3     |

**Table S3** – Agreement between readings of two independent radiologists of MRI features

| <b>MRI Feature</b>                          | <b>Overall Agreement<br/>N (%)</b> | <b>Kappa (95% CI)*</b>      |
|---------------------------------------------|------------------------------------|-----------------------------|
| <u>Volume Indicators</u>                    |                                    |                             |
| Severely Increased Brain Volume*            | 145 (87%)                          | 0.73(0.61-0.83)             |
| Fourth Ventricle CSF                        | see ICC                            | see Supplementary Figure 1a |
| Pre-pontine CSF                             | see ICC                            | see Supplementary Figure 1b |
| <u>T2 Changes</u>                           |                                    |                             |
| Subcortical white matter                    | 136 (81%)                          | 0.58 (0.45-0.71)            |
| Periventricular white matter                | 130 (79%)                          | 0.55 (0.42-0.68)            |
| Thalamus                                    | 127 (76%)                          | 0.53 (0.42-0.66)            |
| Cortical gray matter                        | 134 (81%)                          | 0.38 (0.22-0.54)            |
| Posterior fossa                             | 129 (79%)                          | 0.53 (0.39-0.67)            |
| Corpus callosum                             | 147 (89%)                          | 0.78 (0.69-0.88)            |
| Pons                                        | 128 (78%)                          | 0.57 (0.45-0.69)            |
| Brainstem                                   | 133 (80%)                          | 0.60 (0.48-0.73)            |
| Basal ganglia                               | 148 (88%)                          | 0.61 (0.46-0.77)            |
| <u>DWI changes</u>                          |                                    |                             |
| Supratentorial gray matter                  | 143 (89%)                          | 0.78 (0.69-0.88)            |
| Posterior fossa                             | 158 (96%)                          | 0.82 (0.68-0.96)            |
| Posterior fossa                             | 159 (95%)                          | 0.56 (0.29-0.82)            |
| Corpus callosum                             | 144 (89%)                          | 0.77 (0.67-0.87)            |
| Basal ganglia                               | 138 (83%)                          | 0.62 (0.49-0.75)            |
| <u>Anatomic Comparisons (T2 and/or DWI)</u> |                                    |                             |
| Posterior fossa                             | 120 (71%)                          | 0.49 (0.36-0.61)            |
| T/P/O predominance                          | 154 (91%)                          | 0.65 (0.49-0.82)            |
| Patchy lesions                              | 125 (74%)                          | 0.40 (0.26-0.54)            |

MRI = magnetic resonance imaging; CI = confidence interval; CSF = cerebrospinal fluid.

\* When the feature had three categories, we estimated weighted Kappas using linear weights.

**Table S4** – Comparison of clinical and laboratory findings of retinopathy-positive CM patients who did undergo MRI and those who died prior to undergoing MRI

|                                                                   | Underwent<br>MRI<br>(N = 168) | Died prior<br>to MRI<br>(n=15) | P *               |
|-------------------------------------------------------------------|-------------------------------|--------------------------------|-------------------|
| <b>Demographic</b>                                                |                               |                                |                   |
| Age (months), <i>mean ± SD</i>                                    | 51 ± 28                       | 50 ± 34                        | 0.81              |
| Gender (male), <i>n (%)</i>                                       | 85 (49%)                      | 9 (60%)                        | 0.48              |
| MUAC, <i>mean ± SD</i>                                            | 15 ± 2                        | 15 ± 2                         | 0.96              |
| Weight (kg), <i>mean ± SD</i>                                     | 14 ± 5                        | 13 ± 5                         | 0.72              |
| Height (cm), <i>mean ± SD</i>                                     | 98 ± 16                       | 96 ± 19                        | 0.64              |
| <b>History of Present Illness</b>                                 |                               |                                |                   |
| Duration of fever prior to admission<br>(hrs), <i>median, IQR</i> | 48 (48, 72)                   | 48 (27, 48)                    | 0.06              |
| Duration of coma prior to admission<br>(hrs), <i>median, IQR</i>  | 8 (5, 18)                     | 6 (4,7)                        | 0.04              |
| History of seizures prior to admission                            | 143 (85%)                     | 13 (87%)                       | 0.61 <sup>#</sup> |
| <b>Clinical Examination</b>                                       |                               |                                |                   |
| Temperature (°C), <i>median (IQR)</i>                             | 38.9 (37.4,<br>39.6)          | 38.8 (37.9,<br>39.3)           | 0.53              |
| Pulse rate (beats/min), <i>median<br/>(IQR)</i>                   | 150 (137,<br>170)             | 154 (136,<br>181)              | 0.62              |
| Respiratory rate (/min) <i>mean ±<br/>SD</i>                      | 45 ± 11                       | 46 ± 9                         | 0.78              |

|                                                                    |                              |                              |                         |
|--------------------------------------------------------------------|------------------------------|------------------------------|-------------------------|
| Liver size (cm below costal margin), <i>mean ± SD</i>              | <b>1.4 ± 1.6</b>             | <b>1.3 ± 1.9</b>             | <b>0.73</b>             |
| Jaundice, <i>n (%)</i>                                             | <b>15 (9%)</b>               | <b>1 (7%)</b>                | <b>0.61</b>             |
| Spleen size (cm below costal margin) <i>mean ± SD</i>              | <b>0.8 ± 1.3</b>             | <b>0.9 ± 1.7</b>             | <b>0.81</b>             |
| Nasal flaring <i>n (%)</i>                                         | <b>26 (15%)</b>              | <b>4 (27%)</b>               | <b>0.79<sup>#</sup></b> |
| Deep breathing <i>n (%)</i>                                        | <b>34 (20%)</b>              | <b>7 (47%)</b>               | <b>0.03</b>             |
| <b>BCS, <i>n (%)</i></b>                                           |                              |                              |                         |
| 0                                                                  | <b>15 (9%)</b>               | <b>3 (20%)</b>               | <b>0.38</b>             |
| 1                                                                  | <b>86 (51%)</b>              | <b>7 (47%)</b>               |                         |
| 2                                                                  | <b>67 (39%)</b>              | <b>5 (33%)</b>               |                         |
| Neck rigidity, <i>n (%)</i>                                        | <b>6 (3%)</b>                | <b>1 (7%)</b>                | <b>1.0<sup>#</sup></b>  |
| CSF opening pressure (mm CSF), <i>median (IQR)<sup>&amp;</sup></i> | <b>150 (110, 200)</b>        | <b>185 (110, 300)</b>        | <b>0.43</b>             |
| <b>Laboratory Findings</b>                                         |                              |                              |                         |
| Hematocrit (%), <i>mean ± SD</i>                                   | <b>20.8 ± 5.4</b>            | <b>22.2 ± 7.2</b>            | <b>0.38</b>             |
| Severe anemia (hematocrit ≤ 15), <i>n (%)</i>                      | <b>22 (13%)</b>              | <b>3 (20%)</b>               | <b>0.70<sup>#</sup></b> |
| Platelets (10 <sup>6</sup> /dl blood), <i>median (IQR)</i>         | <b>54 (31, 84)</b>           | <b>51 (18, 88)</b>           | <b>0.68</b>             |
| Thrombocytopenia (platelets ≤ 150,000/dl), <i>n (%)</i>            | <b>153 (94%)</b>             | <b>13 (87%)</b>              | <b>0.64<sup>#</sup></b> |
| Parasitemia (10 <sup>3</sup> /μl blood), <i>median (IQR)</i>       | <b>57920 (15420, 249505)</b> | <b>56960 (14180, 166170)</b> | <b>0.99</b>             |
| White blood cell (10 <sup>3</sup> /ml blood), <i>median (IQR)</i>  | <b>8.5 (6.6, 13.9)</b>       | <b>10.9 (6.9, 11.7)</b>      | <b>0.93</b>             |

|                                                                    |                  |                   |                         |
|--------------------------------------------------------------------|------------------|-------------------|-------------------------|
| Lactate (mmol/l), <i>mean ± SD</i>                                 | <b>7.3 ± 4.3</b> | <b>10.1 ± 4.5</b> | <b>&lt;0.05</b>         |
| Hyperlactatemia (lactate ≥ 5), <i>n</i><br>(%)                     | <b>102 (61%)</b> | <b>12 (80%)</b>   | <b>0.14<sup>#</sup></b> |
| Hypoglycemia at or immediately prior<br>to admission, <i>n</i> (%) | <b>14 (8%)</b>   | <b>1 (7%)</b>     | <b>1.0<sup>#</sup></b>  |
| CSF white cell count >5, <i>n</i> (%)                              | <b>18 (11%)</b>  | <b>1 (11%)</b>    | <b>1.0<sup>#</sup></b>  |

\* P-values were estimated through t-tests when reporting means, Wilcoxon rank sum tests when reporting medians, and Pearson  $\chi^2$  or Fisher Exact test (marked by a <sup>#</sup>) when reporting proportions.
